# Supplementary material
Source: Springer Nature journal article supplement (https://www.springermedizin.de/resource/supplementary/12958_2010_867_MOESM4_ESM.pdf/9569054)

**Caput**

**2**

**1**

**3**

**0**

**VE**

**4**

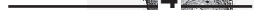

**Corpus**

**5**

**6**

**VD**

**7**

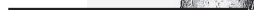

**Cauda**

**8**

**9**

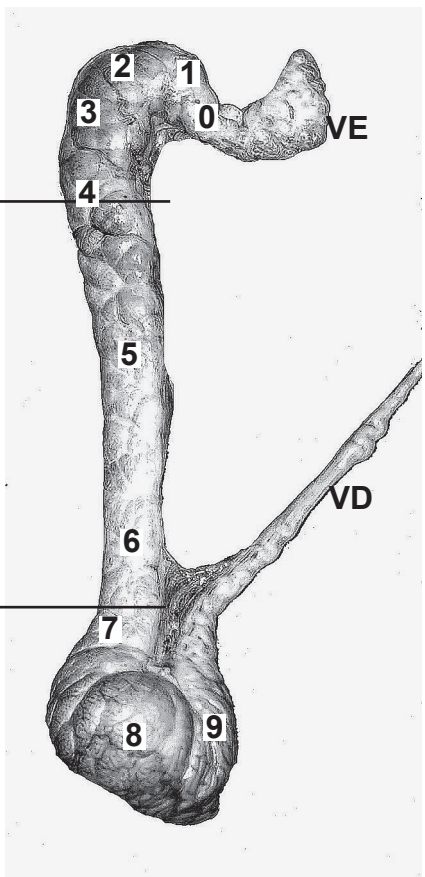

Supplement: MOESM4 [file 9569054]
